# Supplementary material
Source: ML conference proceedings conference paper supplement (https://proceedings.neurips.cc/paper_files/paper/2022/hash/7a41a2bc087b6d1981235d1718e53f51-Abstract.html)
Supplement: Supplementary file 1 [file 7a41a2bc087b6d1981235d1718e53f51-Supplemental-Conference.pdf]

---

# Asymptotics of smoothed Wasserstein distances in the small noise regime

## Supplementary Material

---

Yunzi Ding<sup>1</sup> Jonathan Niles-Weed<sup>2</sup>

<sup>1</sup>Courant Institute of Mathematical Sciences, NYU

<sup>2</sup>Courant Institute of Mathematical Sciences and the Center for Data Science, NYU

yunziding@gmail.com

jnw@cims.nyu.edu

### Contents

|                                         |          |
|-----------------------------------------|----------|
| <b>1 Omitted proofs for Section 3</b>   | <b>1</b> |
| 1.1 Proof of Proposition 3.6 . . . . .  | 1        |
| 1.2 Proof of Proposition 3.8 . . . . .  | 2        |
| 1.3 Proof of Proposition 3.13 . . . . . | 3        |
| 1.4 Proof of Proposition 3.14 . . . . . | 4        |
| <b>2 Omitted proofs for Section 4</b>   | <b>4</b> |
| 2.1 Proof of Theorem 4.1 . . . . .      | 4        |
| 2.2 Proof of Lemma 4.2 . . . . .        | 5        |
| 2.3 Proof of Proposition 4.3 . . . . .  | 5        |
| 2.4 Proof of Theorem 4.4 . . . . .      | 6        |
| <b>3 Omitted proofs for Section 5</b>   | <b>7</b> |
| 3.1 Proof of Theorem 5.1 . . . . .      | 7        |
| 3.2 Proof of Lemma 5.2 . . . . .        | 8        |

### 1 Omitted proofs for Section 3

#### 1.1 Proof of Proposition 3.6

*Proof.* Suppose  $\Gamma$  is  $f$ -strongly cyclically monotone for some positive residual  $f$ . Denote

$$M := \max \left\{ \max_i \|x_i\|, \max_i \|y_i\| \right\}.$$

We will show that  $\Gamma$  is  $\epsilon$ -robust for any  $\epsilon > 0$  satisfying

$$4M\epsilon < \min_{i \neq j} f(i, j).$$

In fact, for any distinct  $\tau(1), \tau(2), \dots, \tau(n) \in [k]$ , by the definition of  $f$ -strong cyclical monotonicity,

$$\sum_{i=1}^n \langle x_{\tau(i)}, y_{\tau(i)} - y_{\tau(i+1)} \rangle \geq \sum_{i=1}^n f(\tau(i), \tau(i+1))$$

Thus for any choice of  $\alpha_{\tau(1)}, \dots, \alpha_{\tau(n)}$  such that  $\max \|\alpha_{\tau(i)}\| \leq \epsilon$ , we have

$$\begin{aligned} & \frac{1}{2} \sum_{i=1}^n \|(x_{\tau(i)} + \alpha_{\tau(i)}) - (y_{\tau(i+1)} + \alpha_{\tau(i+1)})\|^2 - \frac{1}{2} \sum_{i=1}^n \|x_{\tau(i)} - y_{\tau(i)}\|^2 \\ &= \sum_{i=1}^n \langle x_{\tau(i)}, y_{\tau(i)} - y_{\tau(i+1)} \rangle + \sum_{i=1}^n \langle \alpha_{\tau(i)}, x_{\tau(i)} - x_{\tau(i-1)} + y_{\tau(i)} - y_{\tau(i+1)} \rangle + \frac{1}{2} \sum_{i=1}^n \|\alpha_{\tau(i)} - \alpha_{\tau(i+1)}\|^2 \\ &\geq \sum_{i=1}^n f(\tau(i), \tau(i+1)) - 4nM\epsilon \\ &> 0. \end{aligned}$$

Hence  $R(\Gamma) > 0$ .

On the other hand, given  $R(\Gamma) > 0$ , we show that  $\Gamma$  is the unique optimal transport plan from  $\{x_i\}$  to  $\{y_i\}$ . We prove by contradiction. If  $\Gamma$  is not unique, then there exists distinct  $\tau(1), \dots, \tau(n) \in [k]$  such that

$$\sum_{i=1}^n \|x_{\tau(i)} - y_{\tau(i)}\|^2 = \sum_{i=1}^n \|x_{\tau(i)} - y_{\tau(i+1)}\|^2. \quad (1)$$

Since  $R(\Gamma) > 0$ , for  $\epsilon_0 = R(\Gamma)/2$  and any choice of  $\tau(1), \dots, \tau(n)$  with  $\|\tau(i)\| \leq \epsilon_0$ , we have

$$\sum_{i=1}^n \|x_{\tau(i)} - y_{\tau(i)}\|^2 \leq \sum_{i=1}^n \|(x_{\tau(i)} + \alpha_{\tau(i)}) - (y_{\tau(i+1)} + \alpha_{\tau(i+1)})\|^2.$$

Specifically, for any  $j \in [n]$ , letting  $\tau(i) = 0$  for all  $i \neq j$  in the above equation gives

$$2\langle \alpha_{\tau(j)}, x_{\tau(j)} - y_{\tau(j+1)} \rangle \leq \|\alpha_{\tau(j)}\|^2$$

for any  $\alpha_{\tau(j)} \in \mathbb{R}^d$  with  $\|\alpha_{\tau(j)}\| \leq \epsilon_0$ . Therefore we must have

$$x_{\tau(j)} = y_{\tau(j+1)}, \quad \forall j \in [k].$$

Using (1), we also know that

$$x_{\tau(j)} = y_{\tau(j)}, \quad \forall j \in [k],$$

which violates the assumption that  $\{y_i\}$  are distinct points in  $\mathbb{R}^d$ . Thus we conclude that  $\Gamma$  is unique; hence it is also strongly cyclically monotone due to Proposition 3.8.  $\square$

## 1.2 Proof of Proposition 3.8

*Proof.* (i) to (ii). The idea is borrowed from [1, 2, 3]. Suppose  $\Gamma$  is  $f$ -strongly cyclically monotone for a positive residual function  $f$ . For  $i \in [k]$ , denote

$$v_i := \inf_{\substack{\theta(1)=1, \theta(n+1)=i, \\ \theta(2), \dots, \theta(n) \in [k], \\ \theta(s) \neq \theta(s+1)}} \left( \sum_{s=1}^n \langle x_{\theta(s)}, y_{\theta(s)} - y_{\theta(s+1)} \rangle - \sum_{s=1}^n f(\theta(s), \theta(s+1)) \right)$$

By the  $f$ -strong cyclical monotonicity, we have  $v_1 \geq 0$ . Furthermore, for  $i > 1$  and any sequence  $\{\theta(s)\}$  with  $\theta(1) = 1$ ,  $\theta(n+1) = i$  and  $\theta(s) \neq \theta(s+1)$ , there holds

$$\sum_{s=1}^n \langle x_{\theta(s)}, y_{\theta(s)} - y_{\theta(s+1)} \rangle + \langle x_i, y_i - y_1 \rangle \geq \sum_{s=1}^n f(\theta(s), \theta(s+1)) + f(i, 1)$$

and it follows that

$$v_i \geq f(i, 1) - \langle x_i, y_i - y_1 \rangle > -\infty.$$

For any  $j \neq i$  and any fixed  $\epsilon > 0$ , there exists a sequence  $\{\theta(s)\}$  with  $\theta(1) = 1$ ,  $\theta(n+1) = i$  and  $\theta(s) \neq \theta(s+1)$ , such that

$$\sum_{s=1}^n \langle x_{\theta(s)}, y_{\theta(s)} - y_{\theta(s+1)} \rangle - \sum_{s=1}^n f(\theta(s), \theta(s+1)) \leq v_i + \epsilon. \quad (2)$$

Consider the same  $\{\theta(s)\}$  with one more term  $\theta(n+2) := j$ . By definition of  $v_j$  we have

$$v_j \leq \sum_{s=1}^n \langle x_{\theta(s)}, y_{\theta(s)} - y_{\theta(s+1)} \rangle + \langle x_i, y_i - y_j \rangle - \sum_{s=1}^{n+1} f(\theta(s), \theta(s+1)) \quad (3)$$

Comparing (2) and (3) we get

$$v_j \leq v_i + \langle x_i, y_i - y_j \rangle - f(i, j) + \epsilon \quad (4)$$

We set  $\varphi(x_i) = -v_i$ . Letting  $\epsilon \downarrow 0$  in (4) yields

$$\langle x_i, y_i - y_j \rangle \geq \varphi(x_i) - \varphi(x_j) + f(i, j).$$

Hence  $\Gamma$  is  $f$ -strongly implementable.

(ii) to (iii). We prove by contradiction. Suppose  $\Gamma$  is not the unique optimal transport plan; this means either  $\Gamma$  is not optimal or there exists a different coupling  $\Gamma'$  with the same cost. Either case, there exists a sequence  $\{\theta(s)\}_{s=1}^n$  such that

$$\sum_{s=1}^n \|x_{\theta(s)} - y_{\theta(s)}\|^2 \geq \sum_{s=1}^n \|x_{\theta(s)} - y_{\theta(s+1)}\|^2$$

Summing over  $s$ , we get

$$\begin{aligned} \sum_{s=1}^n f(\theta(s), \theta(s+1)) &\leq \sum_{s=1}^n \langle x_{\theta(s)}, y_{\theta(s)} - y_{\theta(s+1)} \rangle \\ &= \frac{1}{2} \left( \sum_{s=1}^n \|x_{\theta(s)} - y_{\theta(s+1)}\|^2 - \sum_{s=1}^n \|x_{\theta(s)} - y_{\theta(s)}\|^2 \right) \\ &\leq 0, \end{aligned}$$

a contradiction.

(iii) to (i). Suppose  $\Gamma$  is the unique optimal transport plan from  $\{x_i\}$  to  $\{y_i\}$ . Denote  $c_0$  the transport cost of  $\Gamma$ . For any other transport plan in the form of a bijection between  $\{x_i\}$  and  $\{y_i\}$ , denote  $c_1$  the minimum among their costs, then  $c_1 > c_0$ . Choose a small enough  $\lambda > 0$ , such that for any choice of  $\tau(1), \tau(2), \dots, \tau(n) \in [k]$  with no duplicates, there holds

$$\frac{\lambda}{2} \sum_{i=1}^n \|y_{\tau(i)} - y_{\tau(i+1)}\|^2 \leq c_1 - c_0.$$

Now for  $f(i, j) = \frac{\lambda}{2} \|y_i - y_j\|^2$  we have

$$\sum_{i=1}^n \|x_{\tau(i)} - y_{\tau(i+1)}\|^2 - \sum_{i=1}^n \|x_{\tau(i)} - y_{\tau(i)}\|^2 \geq c_1 - c_0 \geq \sum_{i=1}^n f(\tau(i), \tau(i+1)).$$

If there are duplicates in  $(\tau(1), \tau(2), \dots, \tau(n))$ , we break the loop  $\tau(1) \rightarrow \tau(2) \rightarrow \dots \rightarrow \tau(n) \rightarrow \tau(1)$  into separate loops without duplicates, apply the above inequality to each loop and sum them up. We conclude by definition that  $\Gamma$  is  $f$ -strongly cyclically monotone.  $\square$

### 1.3 Proof of Proposition 3.13

*Proof of Proposition 3.13.* We only need to show that, for an  $\epsilon$  satisfying (7), and any choice of  $\tau(1), \tau(2), \dots, \tau(n) \in [k]$ , and  $\alpha(1), \dots, \alpha(n)$  with  $\|\alpha(i)\| \leq \epsilon$ , there holds

$$\sum_i \|x_{\tau(i)} - y_{\tau(i)}\|^2 \leq \sum_i \|(x_{\tau(i)} + \alpha_{\tau(i)}) - (y_{\tau(i+1)} + \alpha_{\tau(i+1)})\|^2. \quad (5)$$

In fact, (5) is equivalent to

$$2 \sum_i \langle \alpha_{\tau(i)}, y_{\tau(i+1)} - y_{\tau(i)} + x_{\tau(i-1)} - x_{\tau(i)} \rangle \leq 2 \sum_i \langle x_{\tau(i)}, y_{\tau(i)} - y_{\tau(i+1)} \rangle + \sum_i \|\alpha_{\tau(i)} - \alpha_{\tau(i+1)}\|^2 \quad (6)$$

Since  $\|\alpha(i)\| \leq \epsilon$  for all  $i$ , we have

$$\begin{aligned} & 2 \sum_i \langle \alpha_{\tau(i)}, y_{\tau(i+1)} - y_{\tau(i)} + x_{\tau(i-1)} - x_{\tau(i)} \rangle \\ & \leq 2 \sum_i \epsilon \cdot (\|y_{\tau(i+1)} - y_{\tau(i)}\| + \|x_{\tau(i+1)} - x_{\tau(i)}\|) \\ & \leq \sum_i f(\tau(i), \tau(i+1)) \end{aligned}$$

where we used the choice of  $\epsilon$  in the last inequality. In the meantime, strong implementability gives

$$2 \sum_i \langle x_{\tau(i)}, y_{\tau(i)} - y_{\tau(i+1)} \rangle + \sum_i \|\alpha_{\tau(i)} - \alpha_{\tau(i+1)}\|^2 \geq \sum_i f(\tau(i), \tau(i+1)).$$

Therefore (6) holds, which completes the proof.  $\square$

#### 1.4 Proof of Proposition 3.14

*Proof.* Following the proof of Proposition 3.13, we only need to show that, for the residual  $f(i, j)$  defined in Theorem 3.10, there holds

$$2 \sum_i \epsilon \cdot (\|y_{\tau(i+1)} - y_{\tau(i)}\| + \|x_{\tau(i+1)} - x_{\tau(i)}\|) \leq \sum_i f(\tau(i), \tau(i+1)). \quad (7)$$

By the choice of  $\epsilon$ , we have

$$\begin{aligned} & 2 \sum_i \epsilon \cdot (\|y_{\tau(i+1)} - y_{\tau(i)}\| + \|x_{\tau(i+1)} - x_{\tau(i)}\|) \\ & \leq \sum_i \max \left\{ \frac{1}{\beta} \|x_{\tau(i+1)} - x_{\tau(i)}\|^2, \alpha \|y_{\tau(i+1)} - y_{\tau(i)}\|^2 \right\}. \end{aligned}$$

Meanwhile,

$$\begin{aligned} & \sum_i f(\tau(i), \tau(i+1)) \\ & = \frac{1}{\beta - \alpha} \sum_i (\|x_{\tau(i)} - x_{\tau(i+1)}\|^2 + \alpha \beta \|y_{\tau(i)} - y_{\tau(i+1)}\|^2 - 2\alpha \langle y_{\tau(i)} - y_{\tau(i+1)}, x_{\tau(i)} - x_{\tau(i+1)} \rangle) \\ & \geq \frac{1}{\beta - \alpha} \sum_i \left( \|x_{\tau(i)} - x_{\tau(i+1)}\|^2 + \alpha \beta \|y_{\tau(i)} - y_{\tau(i+1)}\|^2 - \alpha \left( \lambda \|x_{\tau(i)} - x_{\tau(i+1)}\|^2 + \frac{1}{\lambda} \|y_{\tau(i)} - y_{\tau(i+1)}\|^2 \right) \right). \end{aligned}$$

The last inequality holds for any  $\lambda > 0$  by the Cauchy-Schwarz inequality. Choosing  $\lambda = 1/\beta$  and  $\lambda = 1/\alpha$  yields

$$\sum_i f(\tau(i), \tau(i+1)) \geq \max \left\{ \frac{1}{\beta} \|x_{\tau(i+1)} - x_{\tau(i)}\|^2, \alpha \|y_{\tau(i+1)} - y_{\tau(i)}\|^2 \right\}.$$

Therefore (7) holds, which completes the proof.  $\square$

## 2 Omitted proofs for Section 4

### 2.1 Proof of Theorem 4.1

*Proof.* Define the truncated smoothing kernel

$$\tilde{\mathcal{N}}_\sigma := \mathcal{N}(0, \sigma^2 I) \cdot \mathbf{1}\{\|X\| \leq \epsilon_*\} + (1-p)\delta_0$$

where

$$p = \mathbb{P} [\|\mathcal{N}(0, \sigma^2 I)\| < \epsilon_*].$$

Since  $\tilde{\mathcal{N}}_\sigma$  is supported on  $B(0, \epsilon_*)$ , by Lemma 4.2, we know

$$W_2(\mu * \tilde{\mathcal{N}}_\sigma, \nu * \tilde{\mathcal{N}}_\sigma) = W_2(\mu, \nu).$$

Therefore,

$$\begin{aligned} & |W_2(\mu * \mathcal{N}_\sigma, \nu * \mathcal{N}_\sigma) - W_2(\mu, \nu)|^2 \\ &= |W_2(\mu * \mathcal{N}_\sigma, \nu * \mathcal{N}_\sigma) - W_2(\mu * \tilde{\mathcal{N}}_\sigma, \nu * \tilde{\mathcal{N}}_\sigma)|^2 \\ &\leq (W_2(\mu * \mathcal{N}_\sigma, \mu * \tilde{\mathcal{N}}_\sigma) + W_2(\nu * \mathcal{N}_\sigma, \nu * \tilde{\mathcal{N}}_\sigma))^2 \\ &\lesssim \mathbb{E}_{z \sim \mathcal{N}(0, \sigma^2 I)} [\|z\|^2 \mathbf{1}_{\|z\| \geq \sigma_*}] \\ &= \sigma^2 \mathbb{E}_{z \sim \mathcal{N}(0, I)} [\|z\|^2 \mathbf{1}_{\|z\| \geq \sigma_* / \sigma}] \\ &\lesssim \sigma \sigma_* e^{-\sigma_*^2 / 2\sigma^2}. \end{aligned}$$

Here the second inequality is yielded by considering a coupling of  $\mu * \mathcal{N}_\sigma$  and  $\mu * \tilde{\mathcal{N}}_\sigma$  that is the distribution of  $(X + Z, X + Z \cdot \mathbf{1}_{\{\|Z\| \leq \epsilon_*\}})$ , where  $X$  and  $Z$  are independent,  $X \sim \mu$  and  $Z \sim \mathcal{N}(0, \sigma^2 I)$ , and the same coupling for  $\mu$  replaced with  $\nu$ . Taking square root on both sides yields the result.  $\square$

## 2.2 Proof of Lemma 4.2

*Proof.* We naturally split the source measure into  $k$  parts:

$$\mu * Q = \sum_{i=1}^k \left( \frac{1}{k} \delta(x_i) * Q \right)$$

Consider a map  $T$  which, for each  $i \in [k]$ , is defined by

$$T(x) = x + y_i - x_i \quad \forall x \in B(x_i, \sigma_*).$$

We can obtain a transport plan between  $\mu * Q$  and  $\nu * Q$  by considering the distribution of a pair of random variables  $(X, T(X))$  for  $X \sim \mu * Q$ . The support of this plan lies in the set  $\bigcup_{i=1}^k \bigcup_{\alpha \in B(0, \sigma_*)} (x_i + \alpha, y_i + \alpha)$ . By the definition of  $R(\Gamma)$ , this set is cyclically monotone, so this coupling is optimal for  $\mu * Q$  and  $\nu * Q$  by Theorem 3.2. Therefore

$$\begin{aligned} W_2^2(\mu * Q, \nu * Q) &= \int \|x - T(x)\|^2 d(\mu * Q)(x) \\ &= \frac{1}{k} \sum_{i=1}^k \|y_i - x_i\|^2 = W_2^2(\mu, \nu), \end{aligned}$$

as claimed.  $\square$

## 2.3 Proof of Proposition 4.3

*Proof.* For  $M > 0$ , denote

$$g(m) := \sup \left\{ \sum_{i=1}^n \|x_{\tau(i)} - y_{\tau(i)}\|^2 - \sum_{i=1}^n \|(x_{\tau(i)} + \alpha_{\tau(i)}) - (y_{\tau(i+1)} + \alpha_{\tau(i+1)})\|^2 : \max_i \|\alpha_{\tau(i)}\| = m \right\},$$

then  $G(M) = \sup\{g(m) : m \in [0, M]\}$ . We first prove that  $g(m)$  is concave in  $m$ . In fact, denote the set

$$\mathcal{I} = \left\{ (\tau(1), \dots, \tau(n), \alpha_{\tau(1)}, \dots, \alpha_{\tau(n)}) : \tau(i) \in [k], \tau(i) \neq \tau(j), \max_i \|\alpha_{\tau(i)}\| = 1 \right\}.$$

By definition,

$$\begin{aligned} g(m) &= \sup \left\{ \sum_{i=1}^n \|x_{\tau(i)} - y_{\tau(i)}\|^2 - \sum_{i=1}^n \|(x_{\tau(i)} + m\alpha_{\tau(i)}) - (y_{\tau(i+1)} + m\alpha_{\tau(i+1)})\|^2 : \right. \\ &\quad \left. (\tau(1), \dots, \tau(n), \alpha_{\tau(1)}, \dots, \alpha_{\tau(n)}) \in \mathcal{I} \right\} \end{aligned}$$

Note that, for every choice of  $(\tau(1), \dots, \tau(n))$  and  $\alpha_{\tau(1)}, \dots, \alpha_{\tau(n)} \in \mathcal{I}$ ,

$$\sum_{i=1}^n \|x_{\tau(i)} - y_{\tau(i)}\|^2 - \sum_{i=1}^n \|(x_{\tau(i)} + m\alpha_{\tau(i)}) - (y_{\tau(i+1)} + m\alpha_{\tau(i+1)})\|^2$$

is a concave function in  $m$ . Therefore,  $g(m)$  is concave in  $m$ , and  $G(M)$  is also concave in  $M$ .  $\square$

## 2.4 Proof of Theorem 4.4

*Proof.* For  $M > \sigma_*$ , pick  $\tau(1), \tau(2), \dots, \tau(n) \in [k]$  and  $\{\alpha_{\tau(i)}\}_{i=1}^n \subset \mathbb{R}^d$  such that  $\|\alpha_{\tau(i)}\| \leq M$  and

$$\sum_{i=1}^n \|x_{\tau(i)} - y_{\tau(i)}\|^2 - \sum_{i=1}^n \|(x_{\tau(i)} + \alpha_{\tau(i)}) - (y_{\tau(i+1)} + \alpha_{\tau(i+1)})\|^2 = G(M).$$

For every  $i \in [k]$ , denote  $B_{\tau(i)}$  the ball centered at  $x_{\tau(i)} + \alpha_{\tau(i)}$  with radius  $\sigma$ , and  $\hat{B}_{\tau(i)}$  the ball centered at  $y_{\tau(i)} + \alpha_{\tau(i)}$  with radius  $\sigma$ . Also denote

- $\gamma \in \Pi(\mu * \mathcal{N}_\sigma, \nu * \mathcal{N}_\sigma)$  the law of  $(X + Z, Y + Z)$ , where  $(X, Y) \sim \frac{1}{k} \sum_{i=1}^k \delta(x_i, y_i)$  and  $Z \sim \mathcal{N}_\sigma$  are independent.
- $\gamma_{\tau(i)} \in \Pi(\text{Unif}(B_{\tau(i)}), \text{Unif}(\hat{B}_{\tau(i)}))$  the coupling associated with the transport map
$$x \mapsto x + y_{\tau(i)} - x_{\tau(i)};$$
- $\tilde{\gamma}_{\tau(i)} \in \Pi(\text{Unif}(B_{\tau(i)}), \text{Unif}(\hat{B}_{\tau(i+1)}))$  the coupling associated with the transport map
$$x \mapsto x + y_{\tau(i+1)} - x_{\tau(i)};$$
- A constant  $m = c_d \exp\left(-\frac{(M+\sigma)^2}{2\sigma^2}\right)$ , where  $c_d$  is a constant only dependent on the dimension  $d$ .

Consider the following measure in  $\mathbb{R}^d \times \mathbb{R}^d$ :

$$\tilde{\gamma} := \gamma - m \sum_{i=1}^n \gamma_{\tau(i)} + m \sum_{i=1}^n \tilde{\gamma}_{\tau(i)}.$$

We shall show that  $\tilde{\gamma} \in \Pi(\mu * \mathcal{N}_\sigma, \nu * \mathcal{N}_\sigma)$ . We first verify that  $\tilde{\gamma}$  is a positive measure on  $\mathbb{R}^d \times \mathbb{R}^d$ . In fact, for  $x, y \in \mathbb{R}^d$ ,

$$\gamma(dx, dy) = \frac{1}{k} \sum_{i=1}^k \left( \frac{1}{(\sqrt{2\pi}\sigma)^d} e^{-\frac{\|x-x_i\|^2}{2\sigma^2}} dx \cdot \delta_{x-x_i+y_i}(dy) \right).$$

Meanwhile,

$$\left( m \sum_{i=1}^n \gamma_{\tau(i)} \right) (dx, dy) = m \sum_{i=1}^n \left( \frac{\mathbf{1}\{x \in B_{\tau(i)}\}}{\text{Vol}(B_{\tau(i)})} dx \cdot \delta_{x-x_{\tau(i)}+y_{\tau(i)}}(dy) \right).$$

For every  $\tau(i)$  such that  $x \in B_{\tau(i)}$ , note that

$$\|x - x_{\tau(i)}\| \leq \|x - (x_{\tau(i)} + \alpha_{\tau(i)})\| + \|\alpha_{\tau(i)}\| \leq \sigma + M,$$

hence (with a proper choice of  $c_d$ )

$$\frac{1}{k} \frac{1}{(\sqrt{2\pi}\sigma)^d} e^{-\frac{\|x-x_{\tau(i)}\|^2}{2\sigma^2}} \geq \frac{1}{k} \frac{1}{(\sqrt{2\pi}\sigma)^d} e^{-\frac{(M+\sigma)^2}{2\sigma^2}} \geq \frac{m}{\text{Vol}(B_{\tau(i)})}.$$

As a result,  $\gamma - m \sum_{i=1}^n \gamma_{\tau(i)} \geq 0$ , and  $\tilde{\gamma}$  is a positive measure. Also note that its first marginal (i.e. the marginal on the first  $d$  dimensions) and second marginal (i.e. the marginal on the last  $d$

dimensions) agree with the respective marginals of  $\gamma$ . Thus we conclude that  $\tilde{\gamma} \in \Pi(\mu * \mathcal{N}_\sigma, \nu * \mathcal{N}_\sigma)$ . Now note that

$$\begin{aligned} & \int c(x, y) d\gamma(x, y) - \int c(x, y) d\tilde{\gamma}(x, y) \\ &= m \left( \sum_{i=1}^n \|x_{\tau(i)} - y_{\tau(i)}\|^2 - \sum_{i=1}^n \|(x_{\tau(i)} + \alpha_{\tau(i)}) - (y_{\tau(i+1)} + \alpha_{\tau(i+1)})\|^2 \right) \\ &= m \cdot G(M). \end{aligned}$$

In the meantime,

$$\int c(x, y) d\gamma(x, y) = \frac{1}{2k} \sum_{i=1}^k \|x_i - y_i\|^2 = W_2^2(\mu, \nu),$$

therefore,

$$\begin{aligned} & W_2^2(\mu * \mathcal{N}_\sigma, \nu * \mathcal{N}_\sigma) \\ & \leq \int c(x, y) d\tilde{\gamma}(x, y) \\ & \leq W_2^2(\mu, \nu) - G(M) \cdot c_d \exp\left(-\frac{(M + \sigma)^2}{2\sigma^2}\right). \end{aligned}$$

In particular, choosing  $M = \sigma + \sigma_*$  yields

$$W_2^2(\mu, \nu) - W_2^2(\mu * \mathcal{N}_\sigma, \nu * \mathcal{N}_\sigma) \gtrsim G(\sigma + \sigma_*) \exp\left(-c \frac{\sigma_*^2}{\sigma^2}\right).$$

The rest follows from the observation that, for  $\sigma \in (0, 2\sigma_*)$ ,

$$G(\sigma + \sigma_*) = G(\sigma + \sigma_*) - G(\sigma_*) \geq \frac{G(3\sigma_*) - G(\sigma_*)}{2\sigma_*} \cdot \sigma$$

since  $G$  is concave by Proposition 4.3. □

### 3 Omitted proofs for Section 5

#### 3.1 Proof of Theorem 5.1

*Proof.* Suppose that there exists a transport plan  $\pi$  between  $\mu$  and  $\nu$  which achieves the optimal cost and is not a perfect matching. Without loss of generality, we assume that  $(x_1, y_1)$  and  $(x_1, y_2)$  both lie in the support of  $\pi$ . Let  $\lambda = \min\{\pi(x_1, y_1), \pi(x_1, y_2)\}$ . We decompose  $\mu$  and  $\nu$  as

$$\begin{aligned} \hat{\mu} &= \mu - 2\lambda\delta(x_1), & \tilde{\mu} &= 2\lambda\delta(x_1), \\ \hat{\nu} &= \nu - \lambda(\delta(y_1) + \delta(y_2)), & \tilde{\nu} &= \lambda(\delta(y_1) + \delta(y_2)). \end{aligned}$$

By Lemma 5.2, there exists  $c_0 > 0$  such that for  $\sigma \in (0, c_0)$ ,

$$W_2^2(\tilde{\mu}, \tilde{\nu}) - W_2^2(\tilde{\mu} * \mathcal{N}_\sigma, \tilde{\nu} * \mathcal{N}_\sigma) \gtrsim \sigma.$$

Therefore, for  $\sigma \in (0, c_0)$ , we also have

$$\begin{aligned} & W_2^2(\mu, \nu) - W_2^2(\mu * \mathcal{N}_\sigma, \nu * \mathcal{N}_\sigma) \\ & \geq W_2^2(\hat{\mu}, \hat{\nu}) - W_2^2(\hat{\mu} * \mathcal{N}_\sigma, \hat{\nu} * \mathcal{N}_\sigma) + W_2^2(\tilde{\mu}, \tilde{\nu}) - W_2^2(\tilde{\mu} * \mathcal{N}_\sigma, \tilde{\nu} * \mathcal{N}_\sigma) \\ & \geq W_2^2(\hat{\mu}, \hat{\nu}) - W_2^2(\tilde{\mu} * \mathcal{N}_\sigma, \tilde{\nu} * \mathcal{N}_\sigma) \\ & \gtrsim \sigma. \end{aligned}$$

□

### 3.2 Proof of Lemma 5.2

*Proof.* First suppose that  $x, y_1, y_2$  are not on the same line with  $y_1$  between  $x$  and  $y_2$  or  $y_2$  between  $x$  and  $y_1$ . Let  $\Delta$  be the bisecting hyperplane of  $\angle y_1 x y_2$ , namely

$$\Delta = \left\{ z \in \mathbb{R}^d : \frac{\langle z - x, y_1 - x \rangle}{|y_1 - x|} = \frac{\langle z - x, y_2 - x \rangle}{|y_2 - x|} \right\},$$

and define its unit normal vector  $\mathbf{m}$  such that  $\langle \mathbf{m}, y_1 - x \rangle > 0$ . We adopt the decomposition

$$\begin{aligned} \mu_+ &:= \mathcal{N}(x, \sigma^2) \mid \langle z - x, \mathbf{m} \rangle > 0, \\ \mu_- &:= \mathcal{N}(x, \sigma^2) \mid \langle z - x, \mathbf{m} \rangle < 0, \end{aligned} \quad (8)$$

and

$$\begin{aligned} \nu_{1+} &:= \mathcal{N}(y_1, \sigma^2) \mid \langle z - y_1, \mathbf{m} \rangle > 0, \\ \nu_{1-} &:= \mathcal{N}(y_1, \sigma^2) \mid \langle z - y_1, \mathbf{m} \rangle < 0, \\ \nu_{2+} &:= \mathcal{N}(y_2, \sigma^2) \mid \langle z - y_2, \mathbf{m} \rangle > 0, \\ \nu_{2-} &:= \mathcal{N}(y_2, \sigma^2) \mid \langle z - y_2, \mathbf{m} \rangle < 0. \end{aligned} \quad (9)$$

Note that all the six sub-probability measures above have mass 1/2. By the definition of  $W_2$ , we have

$$W_2^2(\mu_0 * \mathcal{N}_\sigma, \nu_0 * \mathcal{N}_\sigma) \leq \frac{1}{2} (W_2^2(\mu_+, \nu_{1+}) + W_2^2(\mu_+, \nu_{1-}) + W_2^2(\mu_-, \nu_{2+}) + W_2^2(\mu_-, \nu_{2-})). \quad (10)$$

It is obvious that

$$W_2^2(\mu_+, \nu_{1+}) = \frac{1}{2} \|x - y_1\|^2, \quad W_2^2(\mu_-, \nu_{2-}) = \frac{1}{2} \|x - y_2\|^2.$$

For  $W_2^2(\mu_+, \nu_{1-})$ , consider the map

$$T_\#(x + t) = y_1 - t, \quad t \sim \mathcal{N}(0, \sigma^2 I)$$

we have

$$\begin{aligned} W_2^2(\mu_+, \nu_{1-}) &\leq \mathbb{E}_{u \sim \mu_+} \|u - T_\# u\|^2 \\ &= \mathbb{E}_{u \sim \mu_+} \|u - (y_1 - u + x)\|^2 \\ &= \frac{1}{2} \|x - y_1\|^2 - 4\mathbb{E}_{u \sim \mu_+} \langle y_1 - x, u - x \rangle + 4\mathbb{E}_{u \sim \mu_+} \|u - x\|^2 \\ &= \frac{1}{2} \|x - y_1\|^2 - 4c_1 \sigma \langle \mathbf{m}, y_1 - x \rangle + 4c_2 \sigma^2, \end{aligned}$$

where  $c_1$  and  $c_2$  are absolute positive constants. Similarly,

$$W_2^2(\mu_-, \nu_{2+}) \leq \frac{1}{2} \|x - y_2\|^2 - 4c_1 \sigma \langle \mathbf{m}, x - y_2 \rangle + 4c_2 \sigma^2.$$

Plugging into (10) we get

$$W_2^2(\mu_0 * \mathcal{N}_\sigma, \nu_0 * \mathcal{N}_\sigma) \leq W_2^2(\mu_0, \nu_0) - 4c_1 \sigma \langle \mathbf{m}, y_1 - y_2 \rangle + 8c_2 \sigma^2,$$

hence  $W_2^2(\mu_0, \nu_0) - W_2^2(\mu_0 * \mathcal{N}_\sigma, \nu_0 * \mathcal{N}_\sigma) \gtrsim \sigma$  for small  $\sigma$ , since  $\langle \mathbf{m}, y_1 - y_2 \rangle > 0$ .

Finally, we consider the special case where  $x, y_1, y_2$  are on the same line and  $y_1$  is between  $x$  and  $y_2$ . We choose  $\mathbf{m}$  the unit vector along the direction  $x - y_1$ , and the same line of proof yields the conclusion.  $\square$

## References

- [1] Jean-Charles Rochet. A necessary and sufficient condition for rationalizability in a quasi-linear context. *Journal of mathematical Economics*, 16(2):191–200, 1987.
- [2] Ralph Rockafellar. Characterization of the subdifferentials of convex functions. *Pacific Journal of Mathematics*, 17(3):497–510, 1966.
- [3] Ralph Rockafellar. On the maximal monotonicity of subdifferential mappings. *Pacific Journal of Mathematics*, 33(1):209–216, 1970.
